# Supplementary material for: U2AF1 mutations alter splice site recognition in hematological malignancies
Source: HighWire-hosted journal article supplement (doi:10.1101/gr.181016.114), 2014-09-29
Supplement: Supp_Legends.docx [file Supp_Legends.docx]

**SUPPLEMENTAL MATERIAL**

**Supplemental Figure S1. Mutant *U2AF1* expression does not cause splicing failure.**

(A) Levels of exon inclusion for NMD-irrelevant cassette exons in K562 cells expressing WT or mutant *U2AF1*, or transfected with a control siRNA or siRNA pool against *U2AF1*.

(B) Levels of NMD-inducing isoforms of cassette exon events in K562 cells expressing WT or mutant *U2AF1*, or transfected with a control siRNA or siRNA pool against *U2AF1*.

(C) Levels of properly spliced constitutive introns in K562 cells expressing WT or mutant *U2AF1*, or transfected with a control siRNA or siRNA pool against *U2AF1*.

**Supplemental Figure S2. *U2AF1* mutations are not associated with increased levels of NMD substrates in AML transcriptomes.**

Plot illustrates the relative levels of NMD-inducing isoforms of alternatively spliced cassette exon events in each AML sample, with samples ordered by increasing level of NMD substrates. For each sample, all NMD-inducing isoforms that were increased or decreased ≥10% relative to the median over all samples were identified, and the quantity 100 x (# increased - # decreased) / (# increased + # decreased) was plotted on the vertical axis. Therefore, a positive value indicates a global increase in levels of NMD substrates, and vice versa. Samples with *U2AF1* mutations (black) do not exhibit higher levels of NMD substrates than do samples without *U2AF1* mutations (gray). Numbers above bars indicate the number of differentially expressed events for each sample.

**Supplemental Figure S3. *U2AF1* mutations are not associated with increased retention of constitutive introns in AML transcriptomes.**

Plot illustrates the relative levels of properly spliced out constitutive introns in each AML sample, with samples ordered by increasing level of proper splicing (intron removal). For each sample, all constitutive introns with evidence of increases/decreases in splicing ≥10% relative to the median over all samples were identified, and the quantity 100 x (# increased - # decreased) / (# increased + # decreased) was plotted on the vertical axis. Therefore, a positive value indicates a global increase in properly spliced constitutive introns, and vice versa. While retention of constitutive introns is common in AML transcriptomes—most bars are below 0—samples with *U2AF1* mutations (black) do not exhibit higher levels of constitutive intron retention than do samples without U2AF1 mutations (gray). Numbers above bars indicate the number of differentially retained constitutive introns for each sample; the plot is restricted to these events (e.g., the vast majority of constitutive introns are never retained in any sample, and those introns are not analyzed here since the plot is restricted to events that differ between samples).

**Supplemental Figure S4. *U2AF1* mutations are not associated with increased exon skipping in AML transcriptomes.**

Plot illustrates the relative levels of inclusion of alternatively spliced cassette exons that are NMD-irrelevant in each AML sample, with samples ordered by increasing level of exon inclusion. For each sample, all NMD-irrelevant cassette exons whose inclusion was increased or decreased ≥10% relative to the median over all samples were identified, and the quantity 100 x (# increased - # decreased) / (# increased + # decreased) was plotted on the vertical axis. Therefore, a positive value indicates a global increase in cassette exon inclusion, and vice versa. Samples with *U2AF1* mutations (black) do not exhibit higher levels of cassette exon skipping than do samples without *U2AF1* mutations (gray). Numbers above bars indicate the number of differentially expressed events for each sample; the plot is restricted to these events. NMD-irrelevant cassette exons are defined as events for which either both or neither of the inclusion and exclusion isoforms are NMD substrates. The plot is restricted to NMD-irrelevant events to distinguish exon inclusion from NMD.

**Supplemental Figure S5. *U2AF1* mutations affect genes involved in disease-relevant cellular processes.**

(A-F) Isoform ratios of splicing events illustrated in Figure 3C-E, G-I. Here, isoform ratios were measured by real-time PCR using primers specific to each isoform. Error bars, standard deviation estimated from five biological replicates. Panels A-F correspond to Figure 3C-E, G-I, in that order.

**Supplemental Figure S6. *U2AF1* mutations are associated with altered 3' splice site consensus sequences in AML transcriptomes.**

As Figure 4A, but for all seven AML samples with *U2AF1* mutations.

**Supplemental Figure S7. *U2AF1* WT AML transcriptomes do not exhibit altered 3' splice site consensus sequences.**

As Figure 4A, but for seven randomly chosen AML samples without *U2AF1* mutations.

**Supplemental File S1. Differentially spliced events in AML samples with S34 mutations.**

Splicing events that are differentially spliced in AML samples with S34F/Y mutations versus WT samples. Each row of the table corresponds to isoform 1 of a splicing event, where isoform 1 is defined as follows: inclusion isoform for cassette exons (“se”), most intron-proximal isoform for competing 5' and 3' splice sites (“a5ss”, “a3ss”), inclusion of upstream exon for mutually exclusive exons (“mxe”), splicing of retained introns annotated as alternative (“ri”) or constitutive (“ci”), and canonical splicing of constitutive junction (“cj”). Each row is assigned a unique identifier specifying the event type and coordinates of the upstream junctions for isoforms 1 and 2 of the event; this event identifier format is a modification of the format used by MISO (Katz et al. 2010). The columns of the table are defined as follows: “coords”, genomic coordinates containing the event; “spliceSites”, dinucleotides at the 5' and 3' splice sites of the upstream junction of isoform 1; “nmdTarget”, whether the specified isoform is a predicted NMD target, where a value of “NA” indicates that the event is not NMD relevant (e.g., neither or both isoforms are predicted substrates for NMD); “deltaPsi”, difference in isoform ratio between the two sample groups; “pval”, *p*-value computed with the Mann-Whitney U test for group comparisons; “gene”, gene ID; “geneName”, gene name; “geneDescription”, gene description. Gene IDs, names, and descriptions are from Ensembl, when available.

**Supplemental File S2. Differentially spliced events in K562 cells expressing S34F.**

As Supplemental File S1, but for K562 cells expressing S34F versus WT *U2AF1*. Here, the “deltaPsi” column specifies the difference in isoform ratio between the mutant vs. WT cells, and “pval” is replaced by “bayesFactor”, the Bayes factor associated with the sample comparison.

**Supplemental File S3. Differentially spliced events in K562 cells expressing S34Y.**

As Supplemental File S2, but for S34Y expression.

**Supplemental File S4. Differentially spliced events in K562 cells expressing Q157P.**

As Supplemental File S2, but for Q157P expression.

**Supplemental File S5. Differentially spliced events in K562 cells expressing Q157R.**

As Supplemental File S2, but for Q157R expression.

**Supplemental File S6. Theoretical model of the U2AF1:RNA complex.**

Computationally predicted model encompassing 3' splice site residues -4 to +3 built using fragment assembly. Multi-model PDB file contains the center (model 1) and 19 randomly selected members (models 2-20) of the largest cluster after structure-based comparison and clustering of all low-energy models.
