# Supplementary material for: U2AF1 mutations alter splice site recognition in hematological malignancies
Source: HighWire-hosted journal article supplement (doi:10.1101/gr.181016.114), 2014-09-29
Supplement: Supp_Methods.docx [file Supp_Methods.docx]

**SUPPLEMENTAL METHODS**

**Vector construction**

A plasmid encoding *U2AF1* cDNA (NCBI identifier NM_006758) was purchased from Open Biosystems and used as a template to generate constructs encoding U2AF1 + Gly Gly + FLAG, which were then cloned into the BamH1/Xho1 sites of pUB6/V5-His A vector (Invitrogen). Site-directed mutagenesis with the Phusion polymerase was used to generate constructs encoding the S34F, S34Y, Q157P, and Q157R mutations. Several PCR amplifications were then performed to generate bicistronic constructs of the form U2AF1 + Gly Gly + FLAG + T2A + mCherry (T2A is the cleavage sequence EGRGSLLTCGDVEENPGP). These inserts were then cloned into the BamH1/Sal1 sites of the self-inactivating lentiviral vector pRRLSIN.cPPT.PGK-GFP.WPRE (Addgene Plasmid 12252). The resulting plasmids co-express U2AF1 and mCherry under control of the PGK promoter.

**Viral supernatant**

293T cells were maintained in DMEM supplemented with 10% fetal calf serum (FCS). To generate viral supernatant, lentiviral vectors were co-transfected into 293T cells along with the packaging vector PsPAX2 (Addgene plasmid 12260) and envelope vector pMD2.G (Addgene plasmid 12259) using the calcium phosphate method. Viral supernatants were harvested at 48 hours after transfection, filtered through a 0.45 um filter and concentrated by centrifugation at 5000g for 24 hours.

**mRNA sequencing**

We prepared poly(A)-selected, unstranded libraries for Illumina sequencing using a modified version of the Illumina TruSeq protocol. After adapter ligation, AMPure XP Beads were used to select 100 – 400 bp DNA fragments by varying bead-to-library volume ratios. 0.5X beads were added to the sample library to select for fragments <400 bp followed by 1X beads to select for >100 bp fragments. DNA fragments were amplified using 15 cycles of PCR and separated by 2% agarose gel electrophoresis. DNA fragments (300 bp) were purified using the Qiagen MinElute gel extraction kit.

**RNA-seq read mapping**

Reads were mapped to the UCSC hg19 (NCBI GRCh37) human genome assembly using Bowtie (Langmead et al. 2009), RSEM (Li and Dewey 2011), and TopHat (Trapnell et al. 2009). RSEM v1.2.4 was modified to call Bowtie v1.0.0 with the -v 2 mapping strategy. RSEM was then invoked with the arguments --bowtie-m 100 --bowtie-chunkmbs 500 --calc-ci --output-genome-bam on the gene annotation file. The resulting BAM file was then filtered to remove alignments with mapq scores of 0 and require a minimum splice junction overhang of 6 bp. Unaligned reads were then aligned with TopHat v2.0.8b with the arguments --bowtie1 --read-mismatches 2 --read-edit-dist 2 --no-mixed --no-discordant --min-anchor-length 6 --splice-mismatches 0 --min-intron-length 10 --max-intron-length 1000000 --min-isoform-fraction 0.0 --no-novel-juncs --no-novel-indels --raw-juncs on the splice junction file, with --mate-inner-dist and --mate-std-dev determined by mapping to constitutive coding exons as determined with MISO’s exon_utils.py script. The resulting alignments were then filtered as described and merged with RSEM’s results to generate a final BAM file.

**Isoform expression measurements**

For isoform expression measurements by real-time PCR (Figure S5), the following PCR primers were used (event IDs are indicated in parentheses):

*DNMT3B* (se@20:31372665:31374308:+|20:31372665:31375036:+): inclusion (forward AGCCCAGCTGTCCGAACT, reverse GTTCCTGCCGATGCTGTT); exclusion (forward GCCCAGCTTCCCTGAGAC, reverse CGTAGGGGGTACTGCTGCT)

*DNMT3B* (se@20:31393213:31394015:+|20:31393213:31395568:+): inclusion (forward GGATAGCCAAGTTAAAGAAAGTACAG, reverse TAGTGCACAGGAAAGCCAAA); exclusion (forward GGGATGAACAGGATCTTTGG, reverse CGAAGAGGTGTCGGATGAC)

*H2AFY* (se@5:134686603:134696187:-|5:134681747:134696187:-): inclusion (forward TGACCTAGTTGCAAGTTGTACAGG, reverse TTGCCACCTTTCTTCTCCAG), exclusion (forward GATGACCTAGGAAACACGCTG, reverse AGCAGCTCCAGCTACTTCCA)

*ATR* (se@3:142169444:142171970:-|3:142168444:142171970:-): inclusion (forward AACTGGAGAAGTTGTCAATGAAAAG, reverse GGGTCTTGGCTTAATGAGGTC) and exclusion (forward TCAATGAAAAGGCCAAGACC, reverse TCAATAGATAACGGCAGTCCTGT)

*CASP8* (a3ss@2:202098835:202131184:+|2:202098835:202131210:+): inclusion (forward TGGGAATATTGAGATTATATTCTCCTG, reverse GAACTTGAGGGAGGCCAGAT); exclusion (forward GGAATATTGAGATGGACTTCAGC, reverse GCTTCCTTTGCGGAATGTAG)

*FANCA* (se@16:89829201:89831298:-|16:89828430:89831298:-): inclusion (forward GAGACCCTTGCACCTTCCTT, reverse CACCATGACCAGGTGAACAT), exclusion (forward GACCCTTGCACCTTCCTTCT, reverse TCTTGGTAAGTTAAGTGAACATCTTCC).

cDNA generation and real-time PCR was performed as described in **Minigenes**, with the exception that here assays were performed in biological quintuplicate using cells collected on subsequent days.

**Gene ontology enrichment analysis**

Gene ontology analysis was performed with GOseq (Young et al. 2010). To identify enriched pathways, the set of all genes that were differentially spliced in K562 cells expressing mutant versus WT *U2AF1* was used as input to GOseq with the “Hypergeometric” method. This identified the cell cycle, DNA repair, chromatin modification, methylation, and RNA processing pathways as enriched with a maximum false discovery rate of 0.01. However, this analysis did not take into account the varying frequency of alternative splicing in different genes. To take this into account, GOseq was called with a bias correction defined for each gene as Σ (geometric mean of number of relevant reads), where the sum is taken over all splicing events annotated for that gene. This bias correction takes into account the inherent bias for detecting alternative splicing within a gene with many exons, high levels of transcription, etc. After incorporating that bias correction, the previously identified pathways were no longer enriched, indicating that *U2AF1* mutations do not preferentially target specific groups of genes beyond those that are frequently alternatively spliced.

**Minigenes**

Minigene plasmids were transfected using the Nucleofector II device from Lonza with the Cell Line Nucleofector Kit V (program T16). We isolated total RNA from K562 cells 48h after transfection using TRIzol and extracted RNA using the Qiagen RNeasy kit. cDNA was generated using 1 ug of total RNA with a primer specific to the minigene transcript immediately upstream of the poly(A) tail (ACAACAGATGGCTGGCAACTAGAAG). Assays were performed in biological triplicate. Triplicates of equal amounts of 6 ng cDNA were used in a 5 uL reaction with 2.5 uL 2x SYBR Green PCR Master Mix (Life Technologies), and 50 nM forward and reverse primers. *ATR* primers: inclusion (forward AACTGGAGAAGTTGTCAATGAAAAG, reverse GGGTCTTGGCTTAATGAGGTC) and exclusion (forward TCAATGAAAAGGCCAAGACC, reverse TCAATAGATAACGGCAGTCCTGT). *EPB49* primers: inclusion (forward GCCTGCAGAACGGAGAGG, reverse CTCAAGCCGCATCCGATCC) and exclusion (forward, GCCTGCAGATCTATCCCTATGAAAT, reverse CTCAAGCCGCATCCGATCC).

***In vitro* splicing**

A pre-mRNA substrate transcribed from the AdML derivative HMS388 was used in all splicing reactions (Jurica et al. 2002; Reichert et al. 2002). Site-directed mutagenesis was used to generate T or C at the -3 nucleotide of the 3' splice site. The DNA template was linearized with BamH1. T7 run-off transcription was used to generate G(5′)ppp(5′)G-capped radiolabeled pre-mRNA using UTP [α-32P]. K562 nuclear extracts were isolated following a published protocol (Folco et al. 2012) with a minor modification (high salt buffer contains 20 mM HEPES pH7.9, 1.2 M KCl, 1.5 mM MgCl2, 25% glycerol, 0.5 mM DTT, and 0.2 mM PMSF). We incubated 10 nM pre-mRNA substrates in standard splicing conditions: 60 mM potassium glutamate, 3 mM magnesium acetate, 2 mM ATP, 5 mM creatine phosphate, 0.05 mg/mL tRNA, and 40% K562 nuclear extract for 1hr at 30°C. RNA was extracted using phenol/chloroform/isoamyl and precipitated with ethanol. RNA species were separated in a 12% denaturing polyacrylamide gel and visualized using a phosphoimager. For quantification in Figure 5, each species was normalized by subtracting the background and then dividing by the number of uracil nucleotides in that species. The percentage of the second step products was calculated by dividing the second step species (spliced mRNA and lariat intron) by the total of all species in the lane.

**REFERENCES**

Langmead B, Trapnell C, Pop M, Salzberg SL. 2009. Ultrafast and memory-efficient alignment of short DNA sequences to the human genome. *Genome Biol* **10**: R25.

Li B, Dewey CN. 2011. RSEM: accurate transcript quantification from RNA-Seq data with or without a reference genome. *BMC Bioinformatics* **12**: 323.

Trapnell C, Pachter L, Salzberg SL. 2009. TopHat: discovering splice junctions with RNA-Seq. *Bioinformatics* **25**: 1105–1111.

Young MD, Wakefield MJ, Smyth GK, Oshlack A. 2010. Gene ontology analysis for RNA-seq: accounting for selection bias. *Genome Biol* **11**: R14.
