# Supplementary figures and images for: U2AF1 mutations alter splice site recognition in hematological malignancies
Source: PubMed Central journal article supplement — Genome Res. 2015 Jan;25(1):14–26. doi: 10.1101/gr.181016.114 (PMC4317169; doi:10.1101/gr.181016.114), 2015-01

**Figure S1**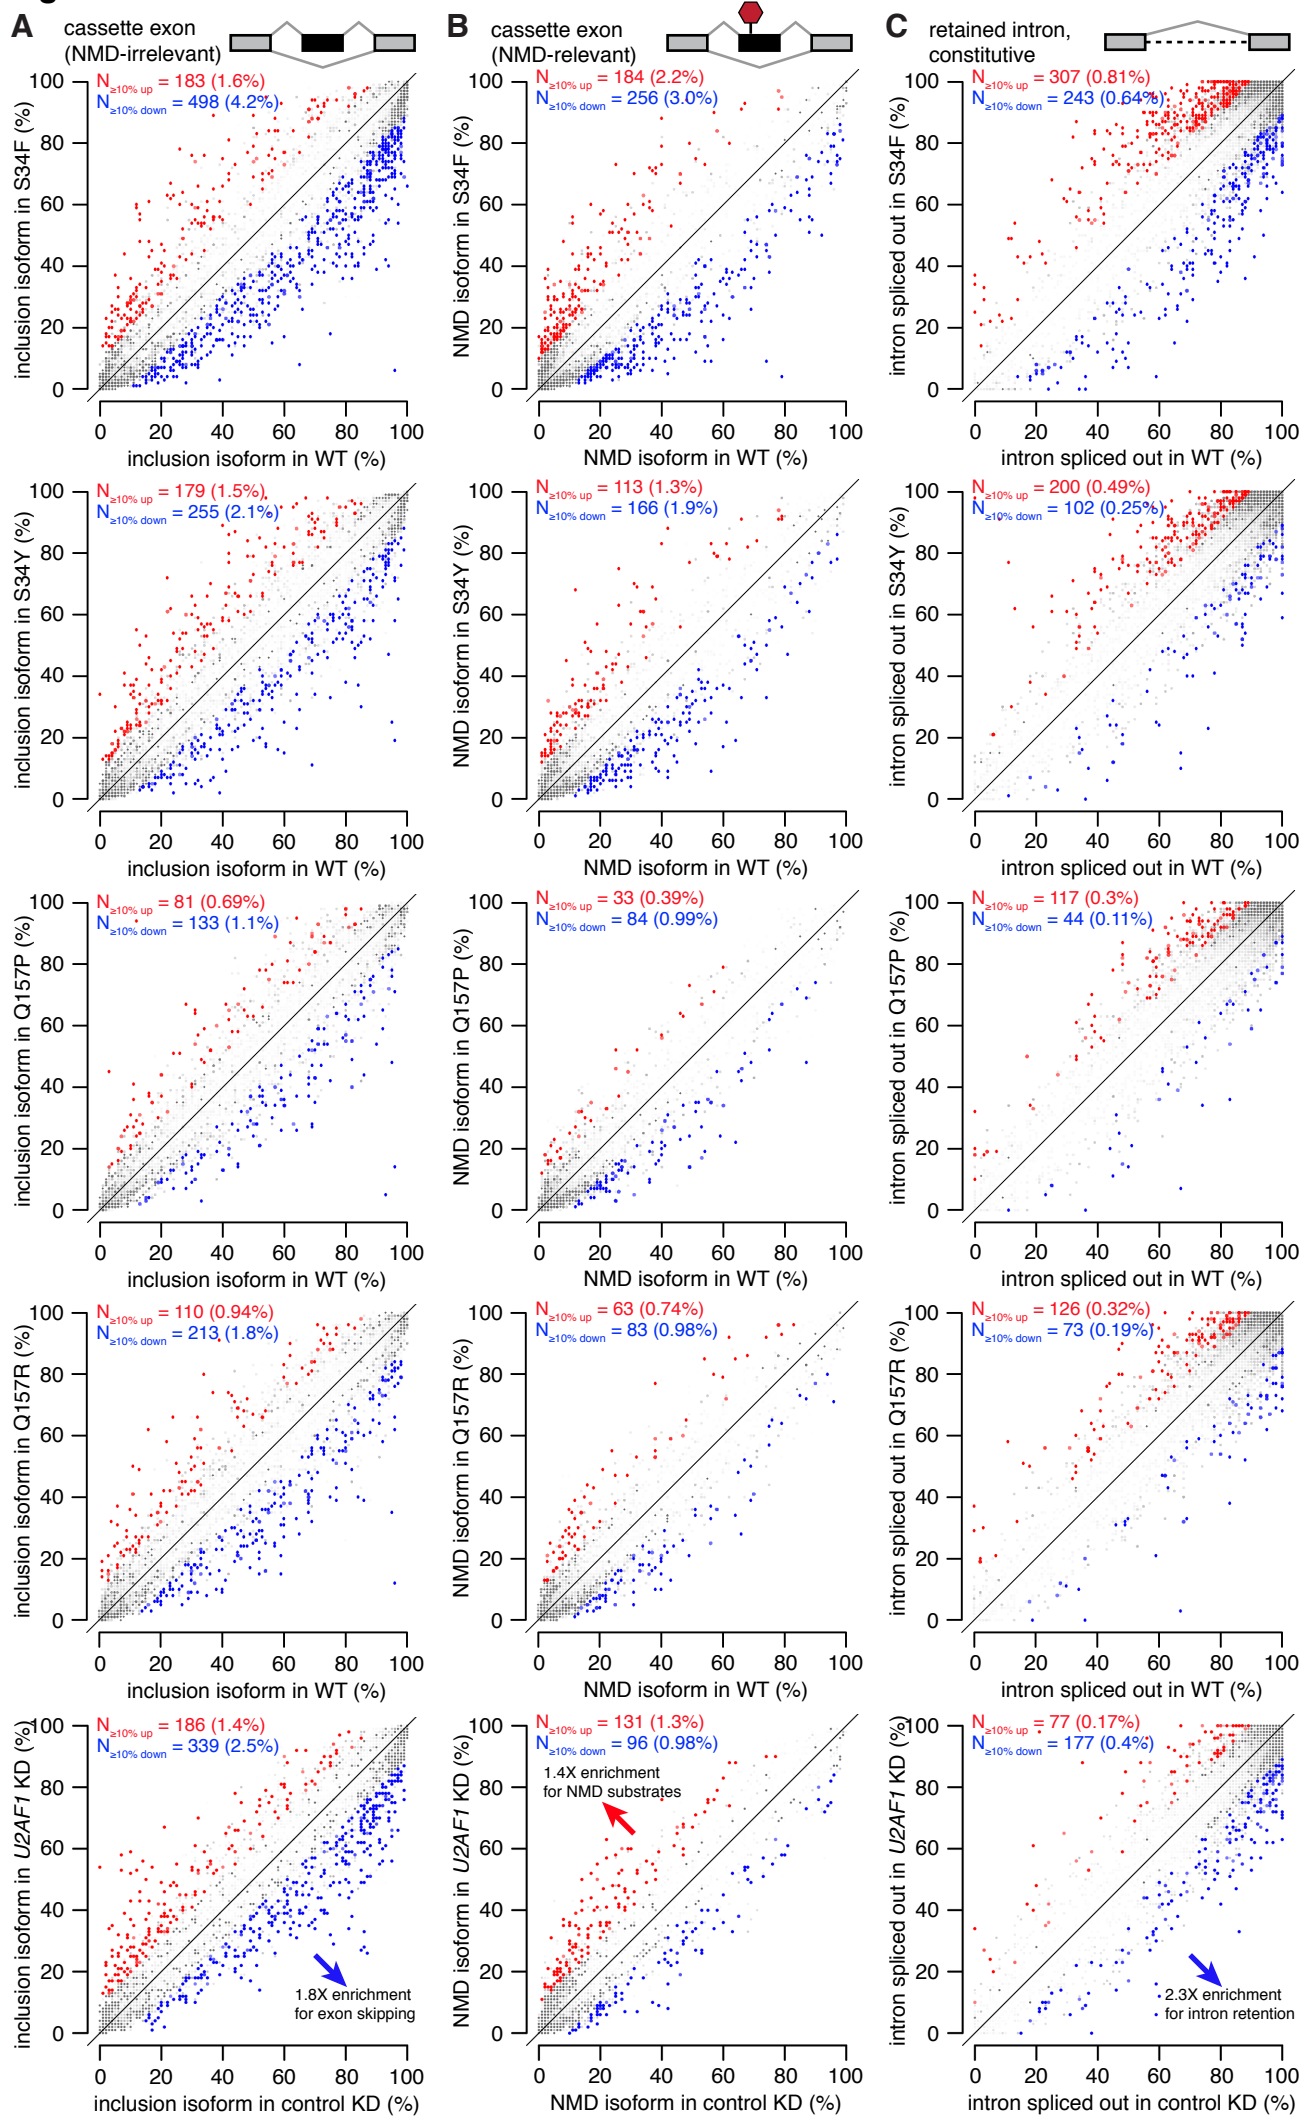

Supplement: supp_gr.181016.114_FigS1.pdf [file supp_gr.181016.114_FigS1.pdf]

**Figure S3**

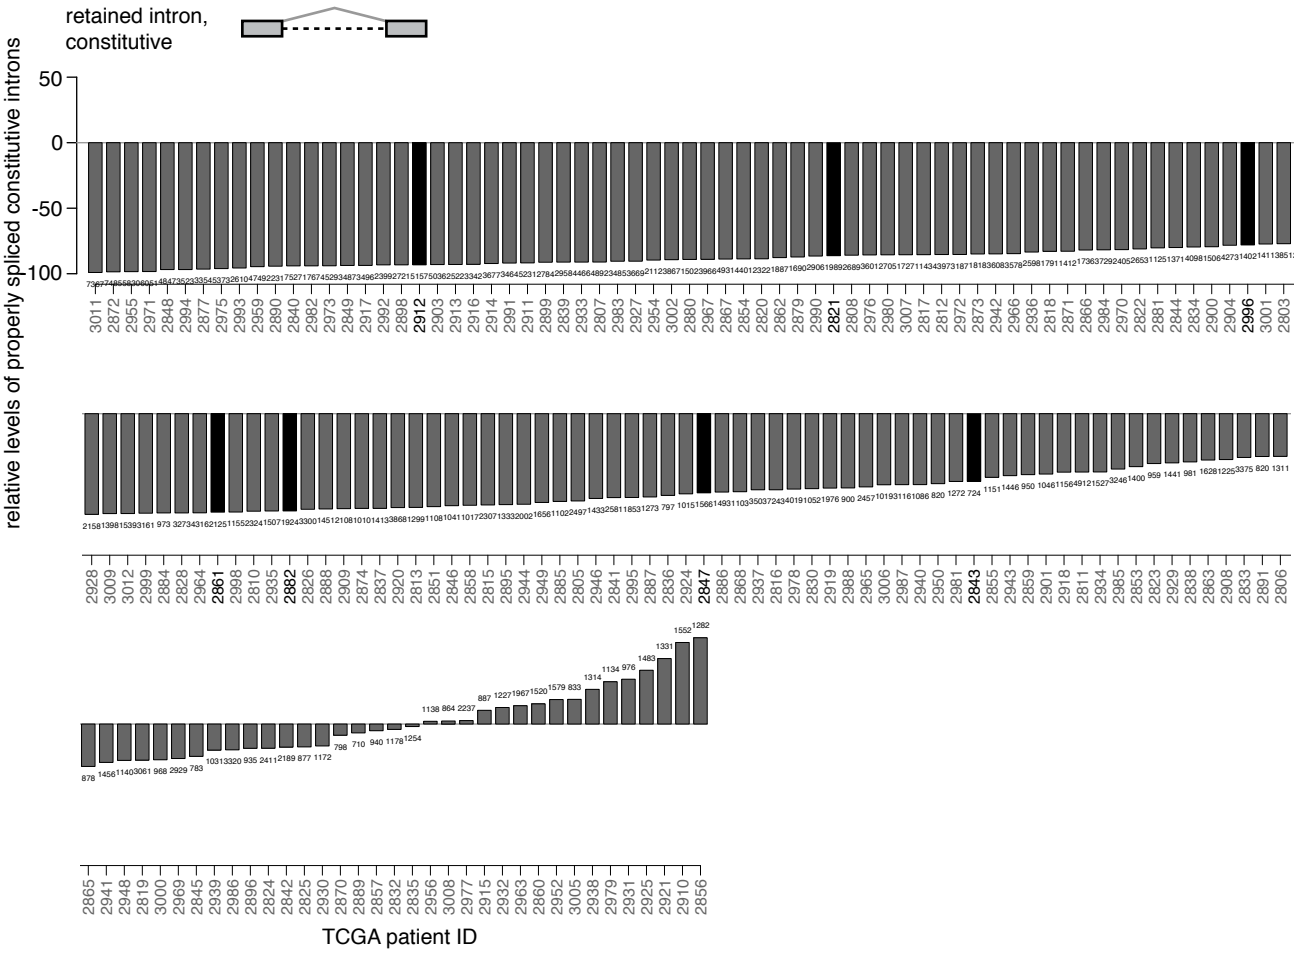

Supplement: supp_gr.181016.114_FigS3.pdf [file supp_gr.181016.114_FigS3.pdf]

**Figure S5**

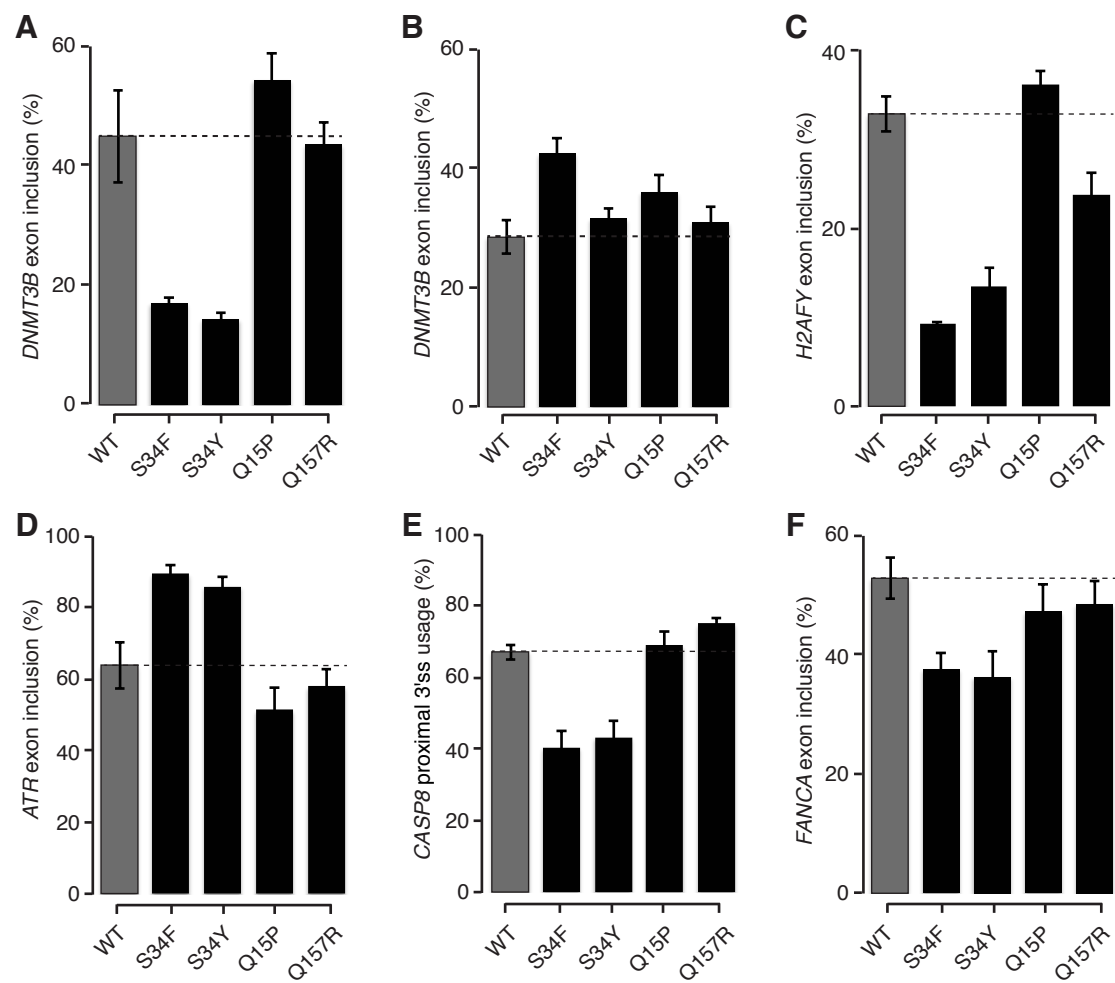

Supplement: supp_gr.181016.114_FigS5.pdf [file supp_gr.181016.114_FigS5.pdf]

# Figure S6

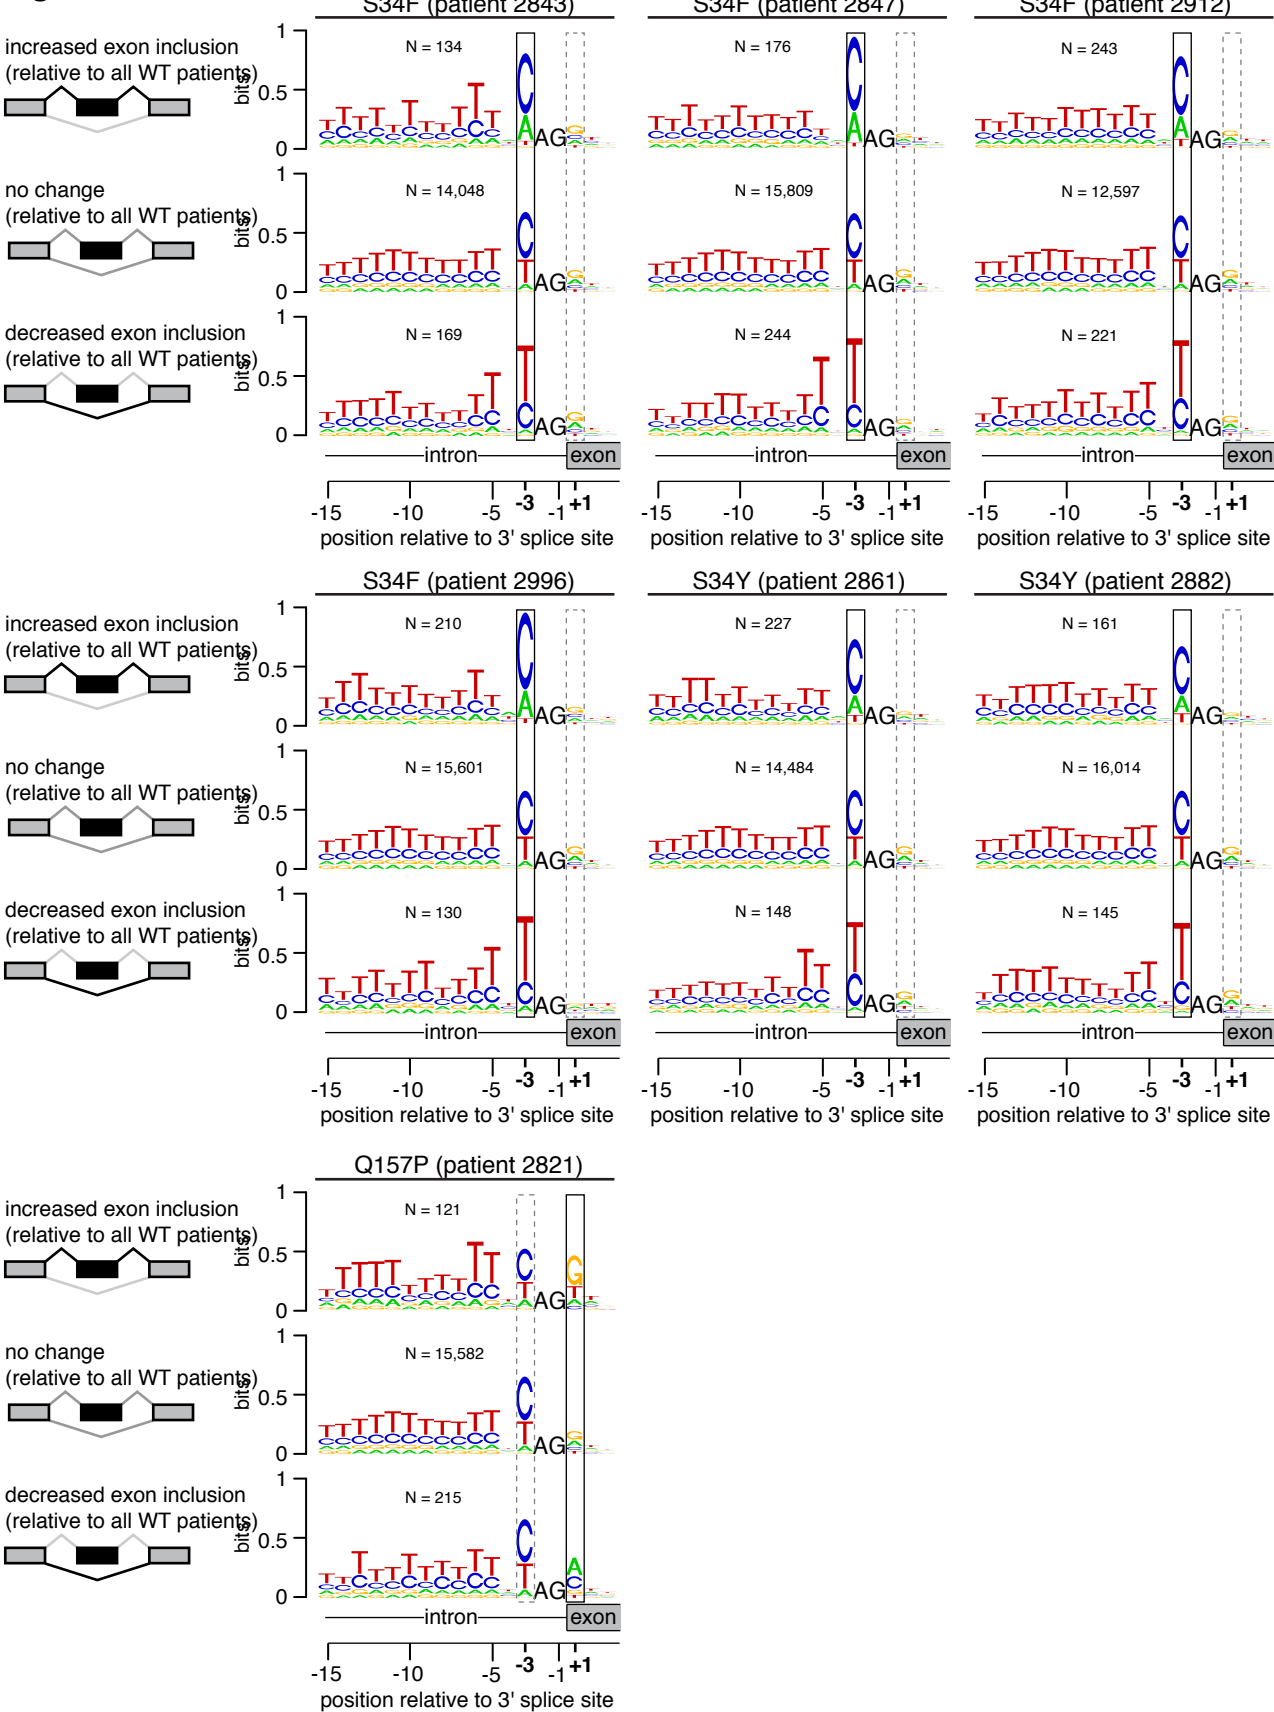

Supplement: supp_gr.181016.114_FigS6.pdf [file supp_gr.181016.114_FigS6.pdf]

**Figure S7**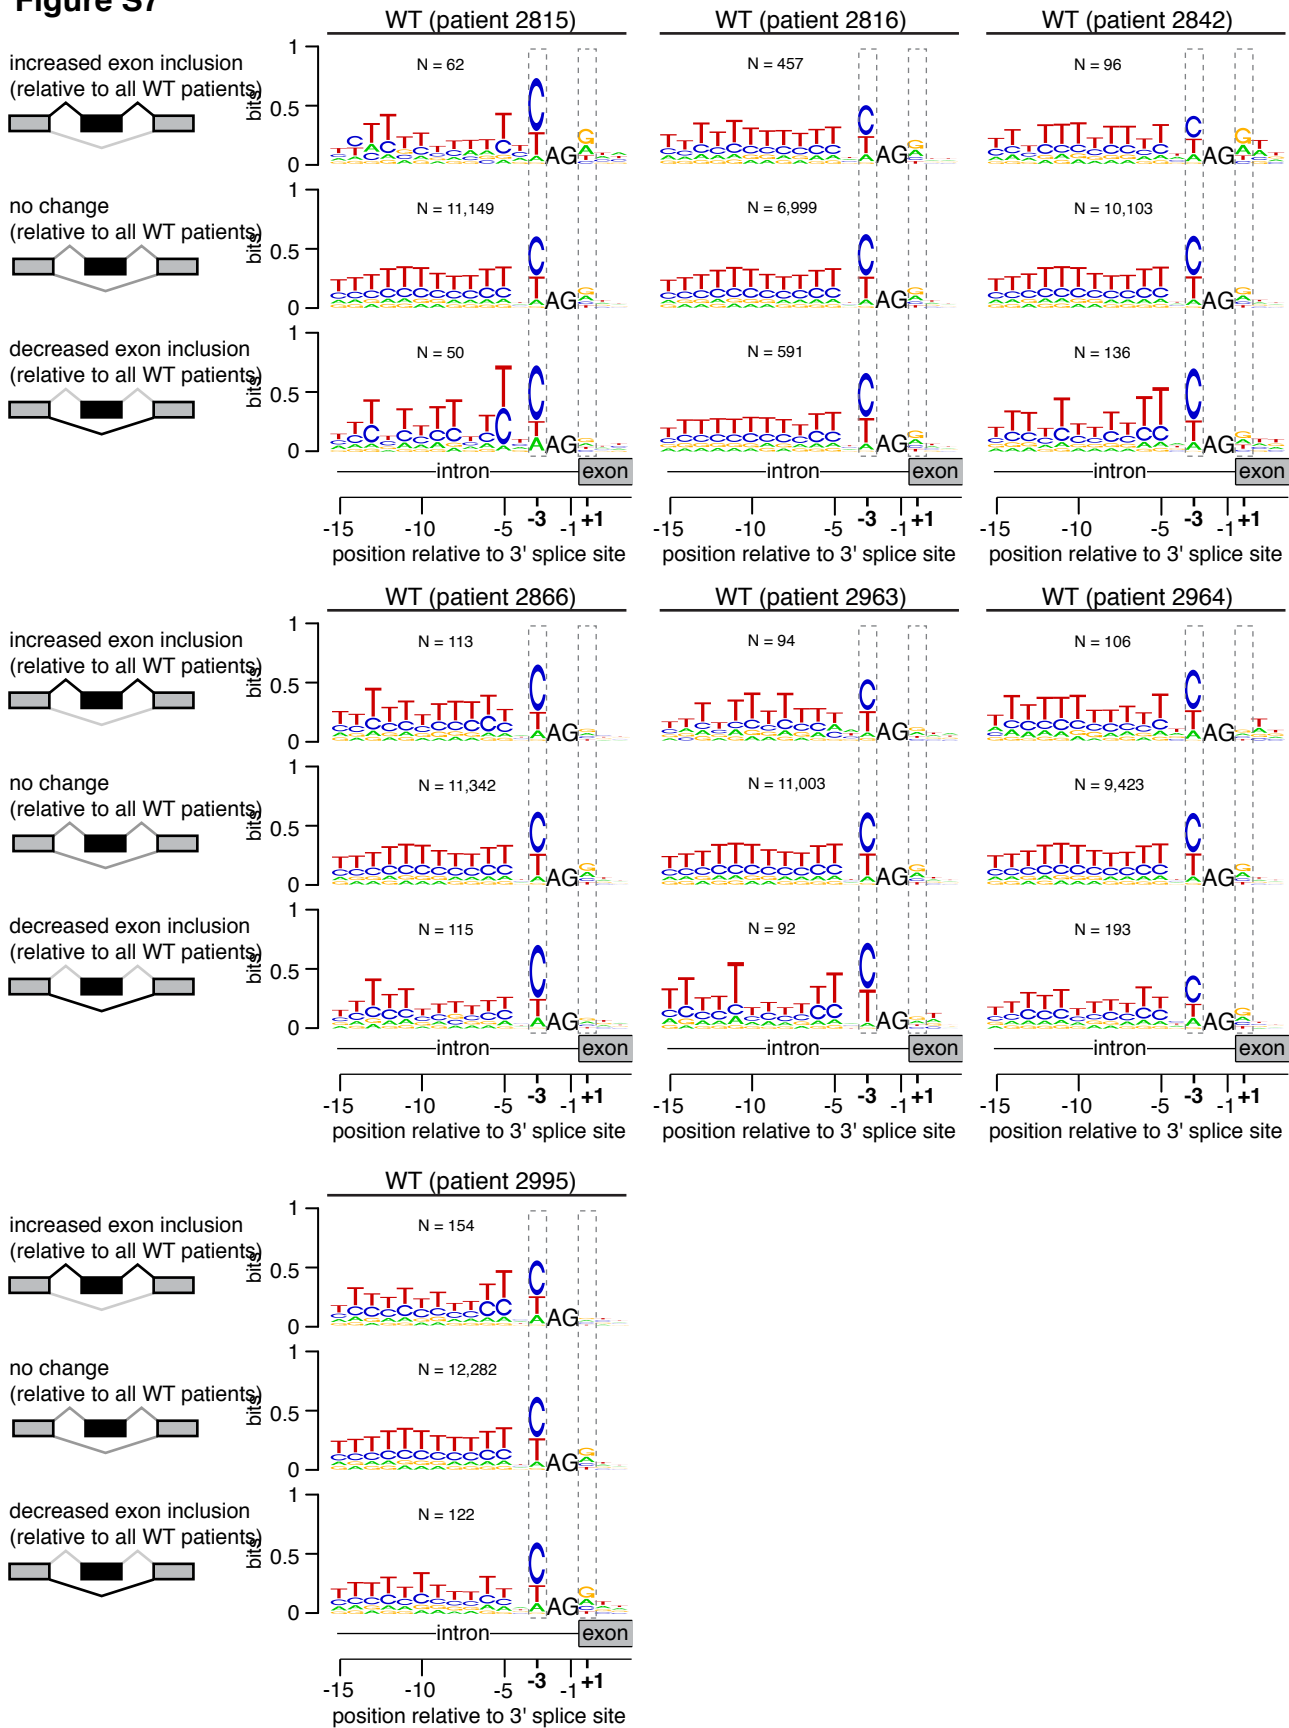

Supplement: supp_gr.181016.114_FigS7.pdf [file supp_gr.181016.114_FigS7.pdf]
